# Supplementary material for: Sialyltransferase-related genes as predictive factors for therapeutic response and prognosis in cervical cancer
Source: PeerJ journal article supplement (doi:10.7717/peerj.19422), 2025-05-22
Supplement: MIQE_checklist.xls [file MIQE_checklist.xls]

## Sheet: Sheet1
ITEM TO CHECK	IMPORTANCE	CHECKLIST
EXPERIMENTAL DESIGN
Definition of experimental and control groups	E	Page 6: Line 161-162; Line 166-168
Number within each group	E	Page 7: Line 173
Assay carried out by core lab or investigator's lab?	D	Page 7: Line 173
Acknowledgement of authors' contributions	D	N/A
SAMPLE
Description	E	Page 7: Line 173
Volume/mass of sample processed	D	Page 7: Line 174
Microdissection or macrodissection	E	Page 7: Line 174
Processing procedure	E	Page 7: Line 174
If frozen - how and how quickly?	E	Page 7: Line 174
If fixed - with what, how quickly?	E	Page 7: Line 174
Sample storage conditions and duration (especially for FFPE samples)	E	N/A
NUCLEIC ACID EXTRACTION
Procedure and/or instrumentation	E	Page 7: Line 173-174
Name of kit and details of any modifications	E	Page 7: Line 173-174
Source of additional reagents used	D	N/A
Details of DNase or RNAse treatment	E	Page 7: Line 175
Contamination assessment (DNA or RNA)	E	N/A
Nucleic acid quantification	E	Page 7: Line 177
Instrument and method	E	Page 7: Line 177
Purity (A260/A280)	D	Page 7: Line 177
Yield	D	N/A
RNA integrity method/instrument	E	N/A
RIN/RQI or Cq of 3' and 5' transcripts	E	N/A
Electrophoresis traces	D	N/A
Inhibition testing (Cq dilutions, spike or other)	E	N/A
REVERSE TRANSCRIPTION
Complete reaction conditions	E	N/A
Amount of RNA and reaction volume	E	Page 7: Line 176
Priming oligonucleotide (if using GSP) and concentration	E	N/A
Reverse transcriptase and concentration	E	Page 7: Line 180
Temperature and time	E	Page 7: Line 181
Manufacturer of reagents and catalogue numbers	D	Page 7: Line 178
Cqs with and without RT	D*	N/A
Storage conditions of cDNA	D	N/A
qPCR TARGET INFORMATION
If multiplex, efficiency and LOD of each assay.	E	N/A
Sequence accession number	E	N/A
Location of amplicon	D	N/A
Amplicon length	E	N/A
In silico specificity screen (BLAST, etc)	E	N/A
Pseudogenes, retropseudogenes or other homologs?	D	N/A
Sequence alignment	D	Table 2
Secondary structure analysis of amplicon	D	N/A
Location of each primer by exon or intron (if applicable)	E	N/A
What splice variants are targeted?	E	N/A
qPCR OLIGONUCLEOTIDES
Primer sequences	E	Table 2
RTPrimerDB Identification Number	D	Table 2
Probe sequences	D**	Table 2
Location and identity of any modifications	E	Table 2
Manufacturer of oligonucleotides	D	Table 2
Purification method	D	Table 2
qPCR PROTOCOL
Complete reaction conditions	E	Page 7: Line 179-180
Reaction volume and amount of cDNA/DNA	E	N/A
Primer, (probe), Mg++ and dNTP concentrations	E	N/A
Polymerase identity and concentration	E	Page 7: Line 180
Buffer/kit identity and manufacturer	E	Page 7: Line 178
Exact chemical constitution of the buffer	D	N/A
Additives (SYBR Green I, DMSO, etc.)	E	Page 7: Line 180
Manufacturer of plates/tubes and catalog number	D	N/A
Complete thermocycling parameters	E	Page 7: Line 179-180
Reaction setup (manual/robotic)	D	N/A
Manufacturer of qPCR instrument	E	Page 7: Line 175
qPCR VALIDATION
Evidence of optimisation (from gradients)	D	Page 7: Line 182-183
Specificity (gel, sequence, melt, or digest)	E	Page 7: Line 182-183
For SYBR Green I, Cq of the NTC	E	Page 7: Line 182-183
Standard curves with slope and y-intercept	E	Page 7: Line 182-183
PCR efficiency calculated from slope	E	Page 7: Line 182-183
Confidence interval for PCR efficiency or standard error	D	Page 7: Line 182-183
r2 of standard curve	E	Page 7: Line 182-183
Linear dynamic range	E	Page 7: Line 182-183
Cq variation at lower limit	E	Page 7: Line 182-183
Confidence intervals throughout range	D	Page 7: Line 182-183
Evidence for limit of detection	E	Page 7: Line 182-183
If multiplex, efficiency and LOD of each assay.	E	Page 7: Line 182-183
DATA ANALYSIS
qPCR analysis program (source, version)	E	N/A
Cq method determination	E	N/A
Outlier identification and disposition	E	N/A
Results of NTCs	E	N/A
Justification of number and choice of reference genes	E	Page 7: Line 183
Description of normalisation method	E	Page 7: Line 180-181
Number and concordance of biological replicates	D	Page 7: Line 173
Number and stage (RT or qPCR) of technical replicates	E	N/A
Repeatability (intra-assay variation)	E	Page 7: Line 173
Reproducibility (inter-assay variation, %CV)	D	Page 7: Line 173
Power analysis	D	Page 7: Line 173
Statistical methods for result significance	E	Page 7: Line 194-196
Software (source, version)	E	Page 7: Line 193
Cq or raw data submission using RDML	D	N/A
Table 1. MIQE checklist for authors, reviewers and editors. All essential information (E) must be submitted with the manuscript. Desirable
information (D) should be submitted if available. If using primers obtained from RTPrimerDB, information on qPCR target, oligonucleotides,
protocols and validation is available from that source.
*: Assessing the absence of DNA using a no RT assay is essential when first extracting RNA. Once the sample has been validated as
RDNA-free, inclusion of a no-RT control is desirable, but no longer essential.
**: Disclosure of the probe sequence is highly desirable and strongly encouraged. However, since not all commercial pre-designed assay
vendors provide this information, it cannot be an essential requirement. Use of such assays is advised against.
